# Supplementary material for: Single-Cell RNA Sequencing Reveals Tissue Compartment-Specific Plasticity of Mycosis Fungoides Tumor Cells
Source: PubMed Central journal article supplement (PMC8097053; doi:10.3389/fimmu.2021.666935), 2021-04-21

DC-1 (C0)

TC-1 (C1)

MC-1 (C2)

MC-2 (C3)

TC-2 (C4)

MF3 (C5)

TC-5 (C6)

M3 (C7)

TC-3 (C8)

FB (C9)

DC-2 (C10)

NK (C11)

BC (C12)

Other (C13)

MC-3 (C14)

EC (C15)

LEK (C16)

TC4 (C17)

TC4 (C18)

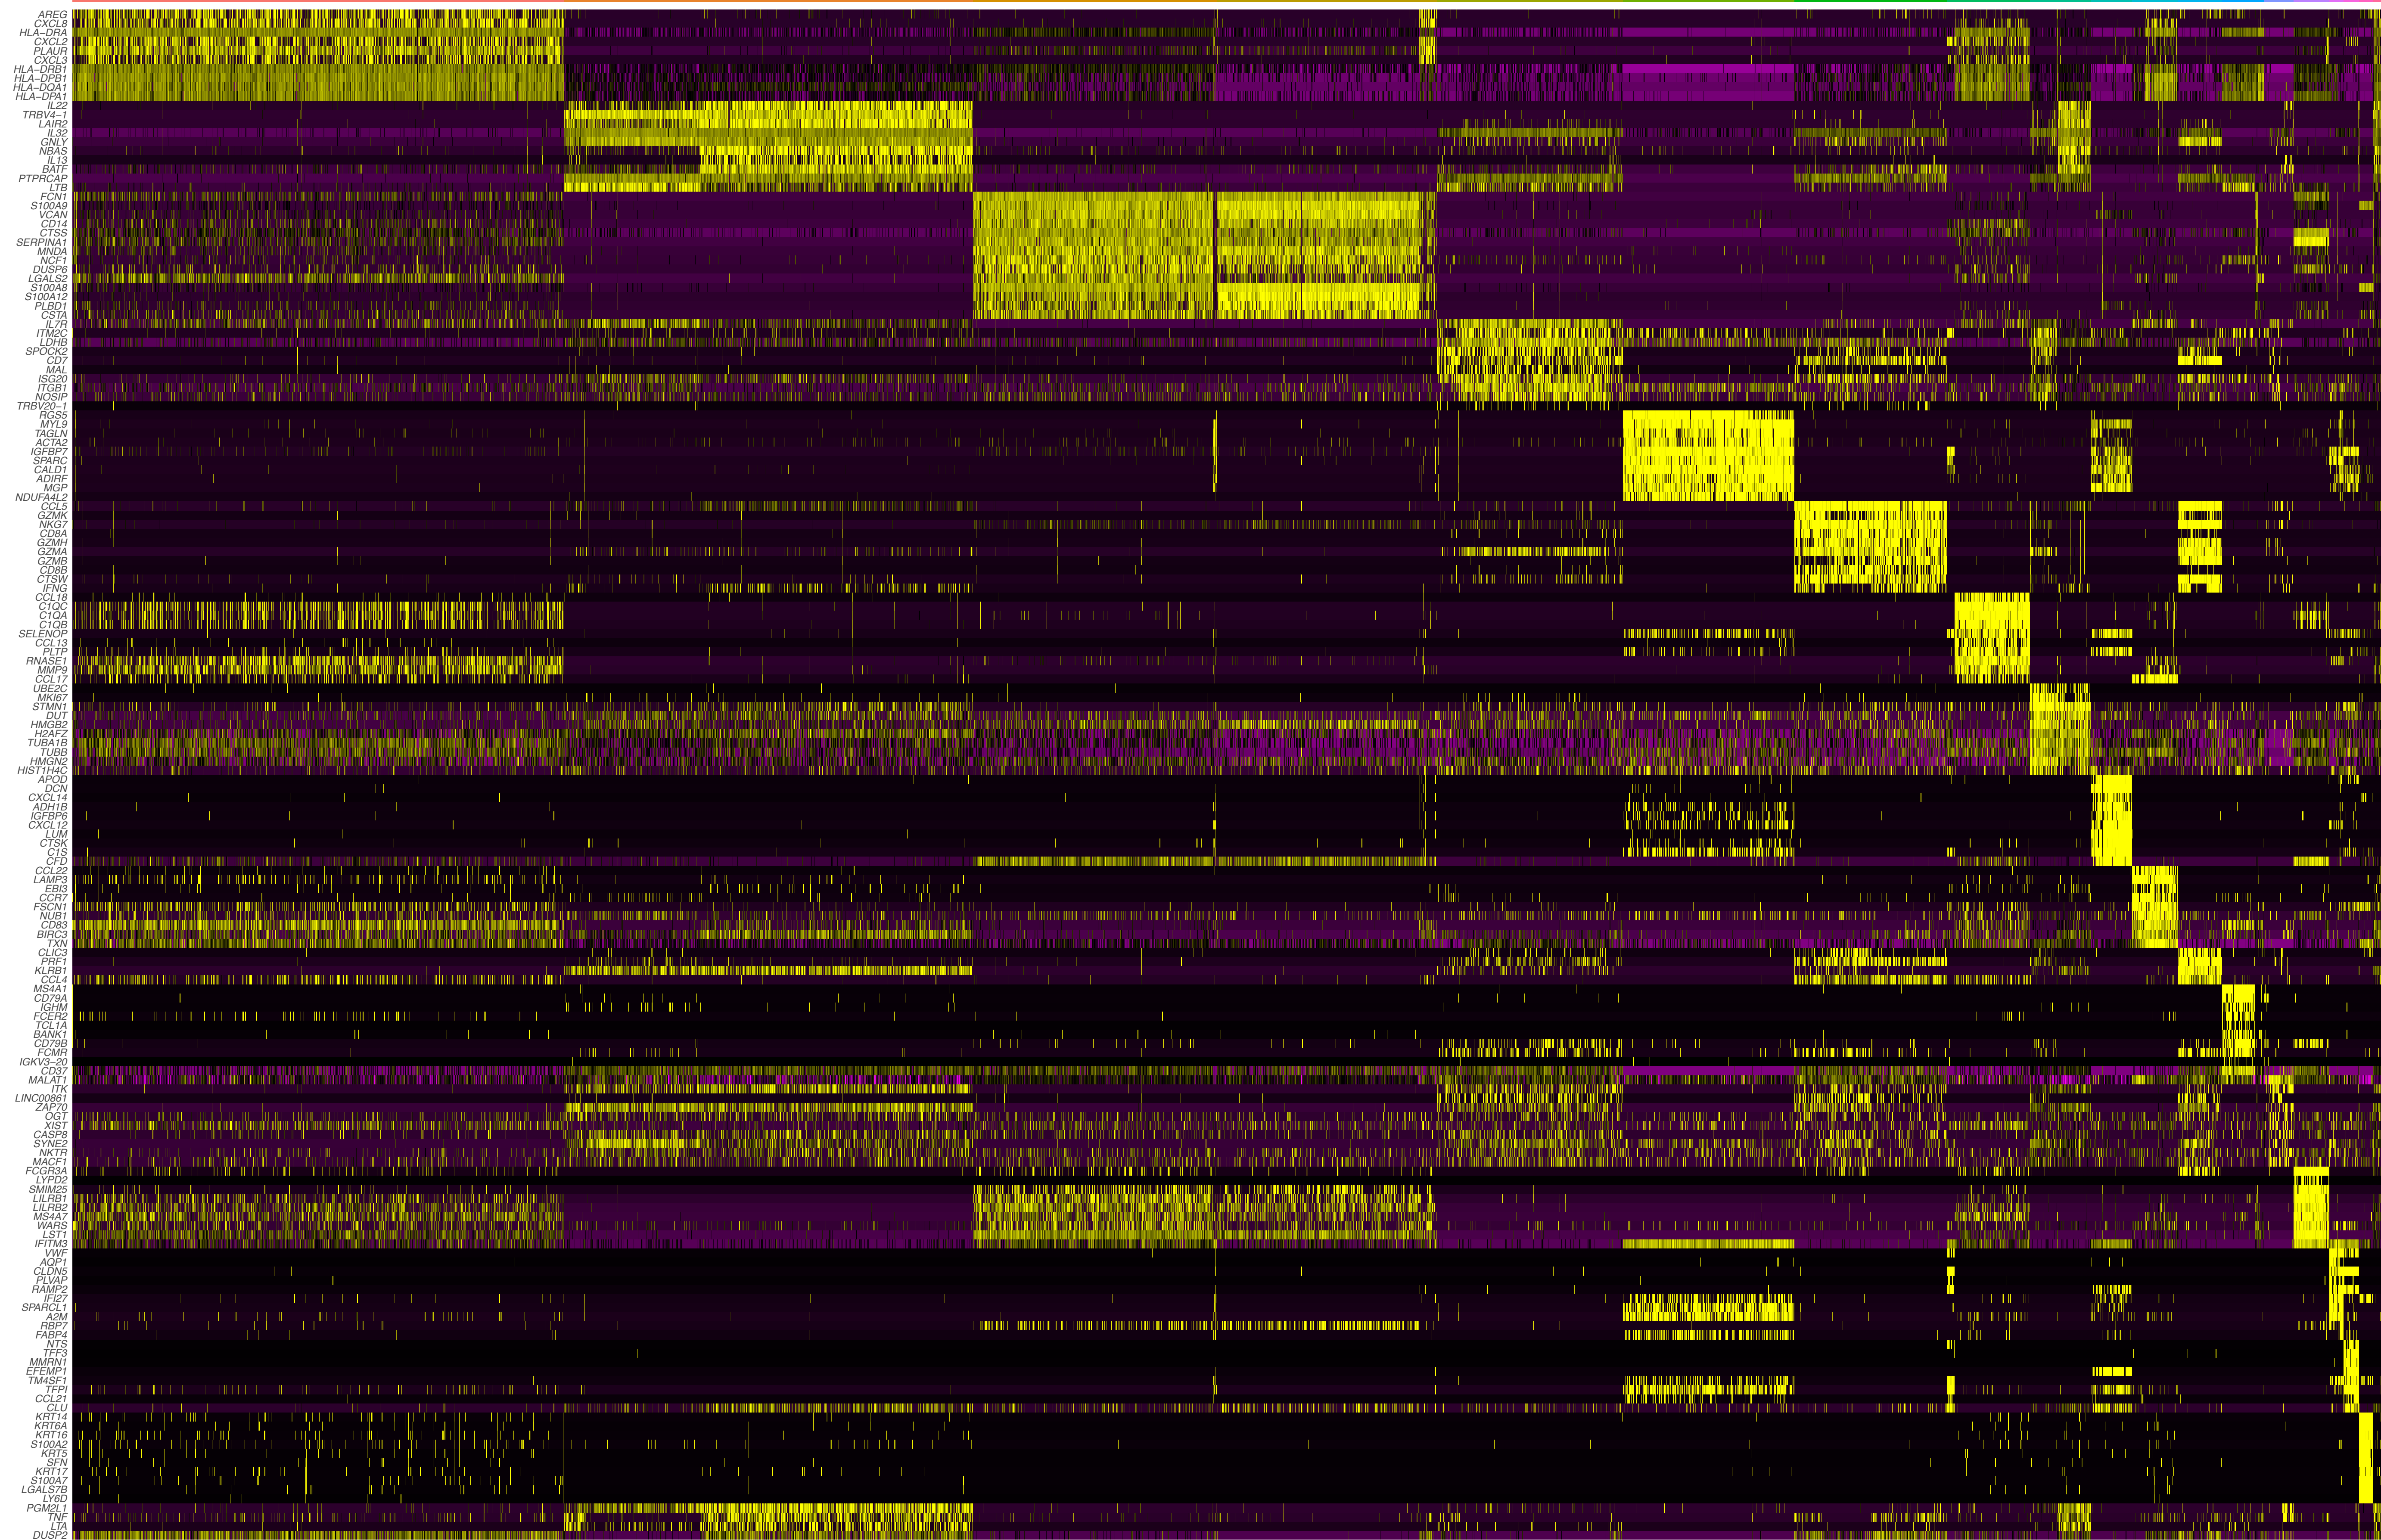

Supplement: Image_1.pdf [file Image_1.pdf]
